# Supplementary material for: The Kinetochore Receptor for the Cohesin Loading Complex
Source: PubMed Central journal article supplement (PMC5610175; doi:10.1016/j.cell.2017.08.017), 2017-09-21
Supplement: mmc1.pdf [file mmc1.pdf]

**Cell, Volume 171**

**Supplemental Information**

**The Kinetochore Receptor  
for the Cohesin Loading Complex**

**Stephen M. Hinshaw, Vasso Makrantonis, Stephen C. Harrison, and Adèle L. Marston**

## Supplemental Tables

**Table S1. Related to Figure 1 - *CTF19* alleles used in this work**

| Name              | Mutations                                               |
|-------------------|---------------------------------------------------------|
| <i>ctf19-2A</i>   | <i>T4A, S5A</i>                                         |
| <i>ctf19-3A-1</i> | <i>S5A, T8A, S14A</i>                                   |
| <i>ctf19-3A-2</i> | <i>T4A, S5A, T7A</i>                                    |
| <i>ctf19-6A</i>   | <i>T8A, S10A, T13A, S14A, S16A, S19A</i>                |
| <i>ctf19-7A</i>   | <i>T7A, T8A, S10A, T13A, S14A, S16A, S19A</i>           |
| <i>ctf19-9A</i>   | <i>T4A, S5A, T7A, T8A, S10A, T13A, S14A, S16A, S19A</i> |
| <i>ctf19-2D</i>   | <i>T4D, S5D</i>                                         |
| <i>ctf19-2E</i>   | <i>T4E, S5E</i>                                         |

**Table S2. Related to Figure 6 - *SCC4* alleles used or discussed in this work**

| Name            | Mutations                                              |
|-----------------|--------------------------------------------------------|
| <i>scc4-m3</i>  | <i>F324A, K327D, K331D</i>                             |
| <i>scc4-m35</i> | <i>F324A, K327D, K331D, K540A, K541A</i>               |
| <i>scc4-m7</i>  | <i>L256K, Y298A, K299D, Y313A, F324A, K327D, K331D</i> |

**Table S3. Related to Figure 6 – Crystallography statistics**

| <b>Data Collection</b>                                 | ScC2 <sup>1-181</sup> -ScC4-<br>Ctf19 <sup>1-6</sup> |
|--------------------------------------------------------|------------------------------------------------------|
| Resolution (Å)                                         | 39.94-3.19                                           |
| Wavelength (Å)                                         | 0.97918                                              |
| Space Group                                            | P6 <sub>2</sub>                                      |
| Unit Cell Dimensions (a, b, c) (Å)                     | 173.0 173.0 145.1                                    |
| Unit Cell Angles ( $\alpha$ , $\beta$ , $\gamma$ ) (Å) | 90 90 120                                            |
| I/ $\sigma$ (last shell)                               | 24.37 (1.0)                                          |
| R <sub>sym</sub> (last shell) (%)                      | 5.5 (106)                                            |
| Completeness (last shell) (%)                          | 99.11 (97.9)                                         |
| Redundancy (last shell)                                | 10.6 (10.3)                                          |
| Unique Reflections (last shell)                        | 40688 (2026)                                         |
| <b>Refinement</b>                                      |                                                      |
| Resolution (Å)                                         | 39.94-3.19                                           |
| Number of Reflections                                  | 40629                                                |
| working                                                | 38633                                                |
| free                                                   | 1994                                                 |
| R <sub>work</sub> (last shell) (%)                     | 20.9 (37.2)                                          |
| R <sub>free</sub> (last shell) (%)                     | 25.8 (41.6)                                          |
| <b>Structure Statistics</b>                            |                                                      |
| r.m.s.d. bond lengths                                  | 0.011                                                |
| r.m.s.d. bond angles                                   | 1.42                                                 |

**Table S4. Related to STAR Methods – Yeast strains built in w303**

| Strain Number | Genotype                                                                                                         | Reference            |
|---------------|------------------------------------------------------------------------------------------------------------------|----------------------|
| AM1145        | <i>MATa SCC1-6HA</i>                                                                                             | Fernius et al., 2013 |
| AM1176        | <i>MATa W303 wild-type</i>                                                                                       | Fernius et al., 2013 |
| AM4643        | <i>MATa pMET-CDC20 2.4CEN4(2.4 kb right of CEN4)::tetOs tetR-GFP</i><br><i>SPC42-tdTomato</i>                    | Fernius et al., 2013 |
| AM6006        | <i>MATa SCC2-6HIS-3FLAG::KanMX6</i>                                                                              | Fernius et al., 2013 |
| AM20613       | <i>MATa SCC2-6HIS-3FLAG::KanMX CTF19::HIS3</i>                                                                   | This study           |
| AM20619       | <i>MATa SCC2-6HIS-3FLAG::KanMX ctf19-9A::HIS3</i>                                                                | This study           |
| AM20622       | <i>MATa SCC2-6HIS-3FLAG::KanMX ctf19-6A::HIS3</i>                                                                | This study           |
| AM20629       | <i>MATa SCC1-6HA CTF19::HIS3</i>                                                                                 | This study           |
| AM21110       | <i>MATa CDC7-6HIS-3FLAG::URA3</i>                                                                                | This study           |
| AM21234       | <i>MATa CDC7-6HIS-3FLAG::URA3 ctf19-9A::HIS3</i>                                                                 | This study           |
| AM21486       | <i>MATa tor1-1 fpr1::NAT DBF4-FRB::KanMX CTF19-FKBP12::TRP1</i>                                                  | This study           |
| AM21613       | <i>MATa tor1-1 fpr1::NAT DBF4-FRB::KanMX CTF19-FKBP12::TRP1</i><br><i>SCC2-6HIS-3FLAG::KanMX</i>                 | This study           |
| AM21614       | <i>MATa tor1-1 fpr1::NAT DBF4-FRB::KanMX CTF19-FKBP12::TRP1</i><br><i>SCC2-6HIS-3FLAG::KanMX ctf3Δ::KanMX</i>    | This study           |
| AM21617       | <i>MATa tor1-1 fpr1::NAT DBF4-FRB::KanMX ctf19-9A-FKBP12::TRP1</i><br><i>SCC2-6HIS-3FLAG::KanMX ctf3Δ::KanMX</i> | This study           |
| AM21681       | <i>MATa tor1-1 fpr1::NAT DBF4-FRB::KanMX ctf19-9A-FKBP12::TRP1</i><br><i>SCC2-6HIS-3FLAG::KanMX</i>              | This study           |
| AM21871       | <i>MATa 3yGFP-DBF4</i>                                                                                           | This study           |
| AM21872       | <i>MATa 3yGFP-DBF4 ctf19-9A::HIS3</i>                                                                            | This study           |

|         |                                                                                                                  |             |
|---------|------------------------------------------------------------------------------------------------------------------|-------------|
| AM21908 | <i>MATa SCC2-6HIS-3FLAG::KanMX ctf19-2A::HIS3</i>                                                                | This study  |
| AM21958 | <i>MATa SCC1-6HA ctf19-2A::HIS3</i>                                                                              | This study  |
| AM22083 | <i>MATa pMET-CDC20 2.4CEN4(2.4 kb right of CEN4)::tetOs tetR-GFP</i><br><i>SPC42-tdTomato ctf19-2A::HIS3</i>     | This study  |
| AM22226 | <i>MATa 3yGFP-DBF4-13Myc::KanMX6</i>                                                                             | This study  |
| AM22230 | <i>MATa 3yGFP-DBF4-FRB::KanMX6</i>                                                                               | This study  |
| AM22360 | <i>MATa tor1-1 fpr1::NAT DBF4-FRB::KanMX ctf19-2A-FKBP12::TRP1</i><br><i>SCC2-6HIS-3FLAG::KanMX</i>              | This study  |
| AM22481 | <i>MATa pMET-CDC20 2.4CEN4(2.4 kb right of CEN4)::tetOs tetR-GFP</i><br><i>SPC42-tdTomato ctf19-2D::HIS3</i>     | This study  |
| AM22484 | <i>MATa pMET-CDC20 2.4CEN4(2.4 kb right of CEN4)::tetOs tetR-GFP</i><br><i>SPC42-tdTomato ctf19-2E::HIS3</i>     | This study  |
| AM22538 | <i>MATa CDC7-6HIS-3FLAG::URA3 DBF4-13Myc::KanMX</i>                                                              | This study  |
| AM22540 | <i>MATa CDC7-6HIS-3FLAG::URA3 DBF4-FRB::KanMX</i>                                                                | This study  |
| AM22672 | <i>MATa tor1-1 fpr1::NAT DBF4-FRB::KanMX ctf19-2A-FKBP12::TRP1</i><br><i>SCC2-6HIS-3FLAG::KanMX ctf3Δ::KanMX</i> | This study  |
| AM23268 | <i>MATa CDC7-6HIS-3FLAG::URA3 ctf3Δ:: KanMX</i>                                                                  | This study  |
| AM23275 | <i>MATa 3yGFP-DBF4 ctf3Δ:: KanMX</i>                                                                             | This study  |
| AM23456 | <i>MATa SCC1-6HA ctf19-9A::HIS3</i>                                                                              | This study  |
| AM24195 | <i>MATa CTF19-6HIS-3FLAG::natMX</i>                                                                              | This study  |
| AM24196 | <i>MATa CTF19-6HIS-3FLAG::natMX ctf3Δ:: KanMX</i>                                                                | This study  |
| SMH433  | <i>MATa leu2Δ0::pGAL1-10::FLAG-cdc7-AS3-CBP-TEV-</i><br><i>proA:DBF4::LEU2</i>                                   | This Study  |
| SMH425  | <i>MATa CTF19-3FLAG::KanMX6</i>                                                                                  | This study  |
| SMH426  | <i>MATa ctf19-9A-3FLAG::KanMX6</i>                                                                               | This study  |
| SMH427  | <i>MATa CTF19-3FLAG::KanMX6 dbf4-9myc::TRP1</i>                                                                  | This study  |
| SMH159  | <i>MATa pMET-CDC20 1.8CEN15(1.8 kb left of CEN15)::lacO-256 lacI-</i>                                            | Goshima and |

|        |                                                                                                       |                |
|--------|-------------------------------------------------------------------------------------------------------|----------------|
|        | <i>GFP</i>                                                                                            | Yanagida, 2000 |
| SMH412 | <i>MATa pMET-CDC20 1.8CEN15(1.8 kb left of CEN15)::lacO-256 lacI-<br/>GFP CTF19-3FLAG::KanMX</i>      | This study     |
| SMH395 | <i>MATa pMET-CDC20 1.8CEN15(1.8 kb left of CEN15)::lacO-256 lacI-<br/>GFP ctf19Δ::KanMX</i>           | This study     |
| SMH396 | <i>MATa pMET-CDC20 1.8CEN15(1.8 kb left of CEN15)::lacO-256 lacI-<br/>GFP ctf19-9A-3FLAG::KanMX</i>   | This study     |
| SMH397 | <i>MATa pMET-CDC20 1.8CEN15(1.8 kb left of CEN15)::lacO-256 lacI-<br/>GFP ctf19-3A-1-3FLAG::KanMX</i> | This study     |

---

**Table S5. Related to STAR Methods – Yeast strains built in s288c**

| <b>Strain Number</b> | <b>Genotype</b>                                                                         | <b>Reference</b>            |
|----------------------|-----------------------------------------------------------------------------------------|-----------------------------|
| SMH170               | <i>MATa CDC7-CBP-TEV-2proA::HIS3</i>                                                    | Gaemmaghami et al.,<br>2003 |
| SMH372               | <i>MATa CTF19-3FLAG::KanMX6</i>                                                         | This study                  |
| SMH378               | <i>MATa ctf19-9A-3FLAG::KanMX6</i>                                                      | This study                  |
| SMH449               | <i>MATa ctf19-2A-3FLAG::KanMX6</i>                                                      | This study                  |
| SMH450               | <i>MATa ctf19-3A-2-3FLAG::KanMX6</i>                                                    | This study                  |
| SMH401               | <i>MATa CTF19-3FLAG::KanMX6 chl4Δ::HIS3</i>                                             | This study                  |
| SMH429               | <i>MATa CTF19-3FLAG::KanMX6 chl4Δ::HIS3 leu2Δ0::pGAL1-10::6HIS-<br/>CDC7:DBF4::LEU2</i> | This study                  |
| SMH430               | <i>MATa ctf19-9A-3FLAG::KanMX6 leu2Δ0::pGAL1-10::6HIS-<br/>CDC7:DBF4::LEU2</i>          | This study                  |
| SMH404               | <i>MATa CTF19-3FLAG::KanMX6 ctf3Δ::HIS3</i>                                             | This study                  |
| SMH402               | <i>MATa CTF19-3FLAG::KanMX6 dcc1Δ::HIS3</i>                                             | This study                  |
| SMH403               | <i>MATa CTF19-3FLAG::KanMX6 csm3Δ::HIS3</i>                                             | This study                  |
| SMH477               | <i>MATa CTF19-3FLAG::KanMX6 SLD7-GFP::HIS3 SPC110-<br/>mCherry::hphMX4</i>              | This study                  |
| SMH480               | <i>MATa ctf19-9A-3FLAG::KanMX6 SLD7-GFP::HIS3 SPC110-<br/>mCherry::hphMX4</i>           | This study                  |
| SMH478               | <i>MATa ctf19Δ::KanMX6 SLD7-GFP::HIS3 SPC110-mCherry::hphMX4</i>                        | This study                  |
| SMH473               | <i>MATa CTF19-3FLAG::KanMX6 CDC7-GFP::HIS3 SPC110-<br/>mCherry::hphMX4</i>              | This study                  |
| SMH476               | <i>MATa ctf19-9A-3FLAG::KanMX6 CDC7-GFP::HIS3 SPC110-</i>                               | This study                  |

|        |                                                                          |            |
|--------|--------------------------------------------------------------------------|------------|
|        | <i>mCherry::hphMX4</i>                                                   |            |
| SMH474 | <i>MATa ctf19Δ::KanMX6 CDC7-GFP::HIS3 SPC110-mCherry::hphMX4</i>         | This study |
| SMH353 | <i>MATa CTF19-3FLAG::KanMX6 SCC2-GFP::HIS3 MTW1-tdTomato::natMX</i>      | This study |
| SMH361 | <i>MATa ctf19Δ::KanMX6 SCC2-GFP::HIS3 MTW1-tdTomato::natMX</i>           | This study |
| SMH354 | <i>MATa ctf19-9A-3FLAG::KanMX6 SCC2-GFP::HIS3 MTW1-tdTomato::natMX</i>   | This study |
| SMH355 | <i>MATa ctf19-3A-1-3FLAG::KanMX6 SCC2-GFP::HIS3 MTW1-tdTomato::natMX</i> | This study |
| SMH451 | <i>MATa ctf19-2A-3FLAG::KanMX6 SCC2-GFP::HIS3 MTW1-tdTomato::natMX</i>   | This study |
| SMH452 | <i>MATa ctf19-3A-2-3FLAG::KanMX6 SCC2-GFP::HIS3 MTW1-tdTomato::natMX</i> | This study |
| SMH459 | <i>MATa ctf19-6A-3FLAG::KanMX6 SCC2-GFP::HIS3 MTW1-tdTomato::natMX</i>   | This study |
| SMH460 | <i>MATa ctf19-7A-3FLAG::KanMX6 SCC2-GFP::HIS3 MTW1-tdTomato::natMX</i>   | This study |
| SMH416 | <i>MATa csm3Δ::KanMX6 SCC2-GFP::HIS3 MTW1-tdTomato::natMX</i>            | This study |
| SMH417 | <i>MATa dcc1Δ::KanMX6 SCC2-GFP::HIS3 MTW1-tdTomato::natMX</i>            | This study |

---
